# Supplementary material
Source: Springer Nature journal article supplement (https://www.springermedizin.de/resource/supplementary/12905_2010_225_MOESM3_ESM.pdf/9518236)
Supplement: MOESM3 [file 9518236]

### **Justified as part of male prestige**

- Men having different blood
- Influenced by the power of money

### **Viewed as discreditable and unfair**

- A shame to admit
- A threat to human dignity

### **Results in emotional entrapment**

- Self-blame
- Shifting tolerance

### **Fed up with passivity**

- A wish for change
- Gender norms in transition

**MOVING FROM FRUSTRATION TO  
QUESTIONING TRADITIONAL GENDER NORMS**

*"..the solution to IPV problems should come from above.. I mean initiated by the cabinet members.. We may fail to solve matters individually....."*

*"People fight at night with doors closed. Who will open for you.....  
..we need strong laws that are strictly followed"*

*"IPV should stop; you know the women we beat are other peoples sisters and mothers"*

*"After 3 years of suffering I decided to end the silence and shared the dangers ...with my brother who assisted for divorce. It was not possible alone"*
